# Supplementary material for: Clinical Features of Hepatitis C Virus-Related Acute-On-Chronic Liver Failure in a Korean Population
Source: Research Square preprint supplement (doi:10.21203/rs.3.rs-181706/v1), 2021-02-12
Supplement: Supplementary file 1 [file c44c760cdf643236e2d6cb2e.docx]

Supplementary Table 1. Site of bacterial infection (n=109)

|  | No ACLF (n=74) | ACLF (n=35) | *P* |
| --- | --- | --- | --- |
| Bacterial infections | 17 (23.0%) | 20 (57.1%) | 0.001 |
| Site |  |  |  |
| Spontaneous bacterial peritonitis | 2 (11.8%) | 5 (25.0%) | 0.416 |
| Pneumonia | 3 (17.6%) | 5 (25.0%) | 0.701 |
| Urinary tract infection | 2 (11.8%) | 3 (15.0%) | 1.000 |
| Skin infection | 4 (23.5%) | 0 | 0.036 |
| Colitis | 3 (17.6%) | 0 | 0.088 |
| Unproved | 1 (5.9%) | 4 (20.0%) | 0.348 |
| Other | 2 (11.8%) | 3 (15.0%) | 1.000 |

Supplementary Table 2. Main causes of death at 28 and 90 days after enrollment

| Causes of death | Death at 28 days (n=23) | Death at 90 days (n=30) |
| --- | --- | --- |
| Multiple organ failure without septic  or hypovolemic shock | 11 (47.8%) | 16 (53.3%) |
| Septic shock | 5 (21.7%) | 6 (20.0%) |
| Hypovolemic shock | 5 (21.7%) | 5 (16.7%) |
| Cerebral hemorrhage | 0 | 1 (3.3%) |
| Other causes | 1 (4.3%) | 1 (3.3%) |
| Unknown causes | 1 (4.3%) | 1 (3.3%) |
